# Supplementary material for: Assessing the Impact of Polyethylene Nano/Microplastic Exposure on Human Vaginal Keratinocytes
Source: MDPI journal article supplement (doi:10.3390/ijms241411379), 2023-07-12

SUPPLEMENTARY MATERIALS

Figure S1. TEM images with marked endo-vesicular PE N/MPL size.

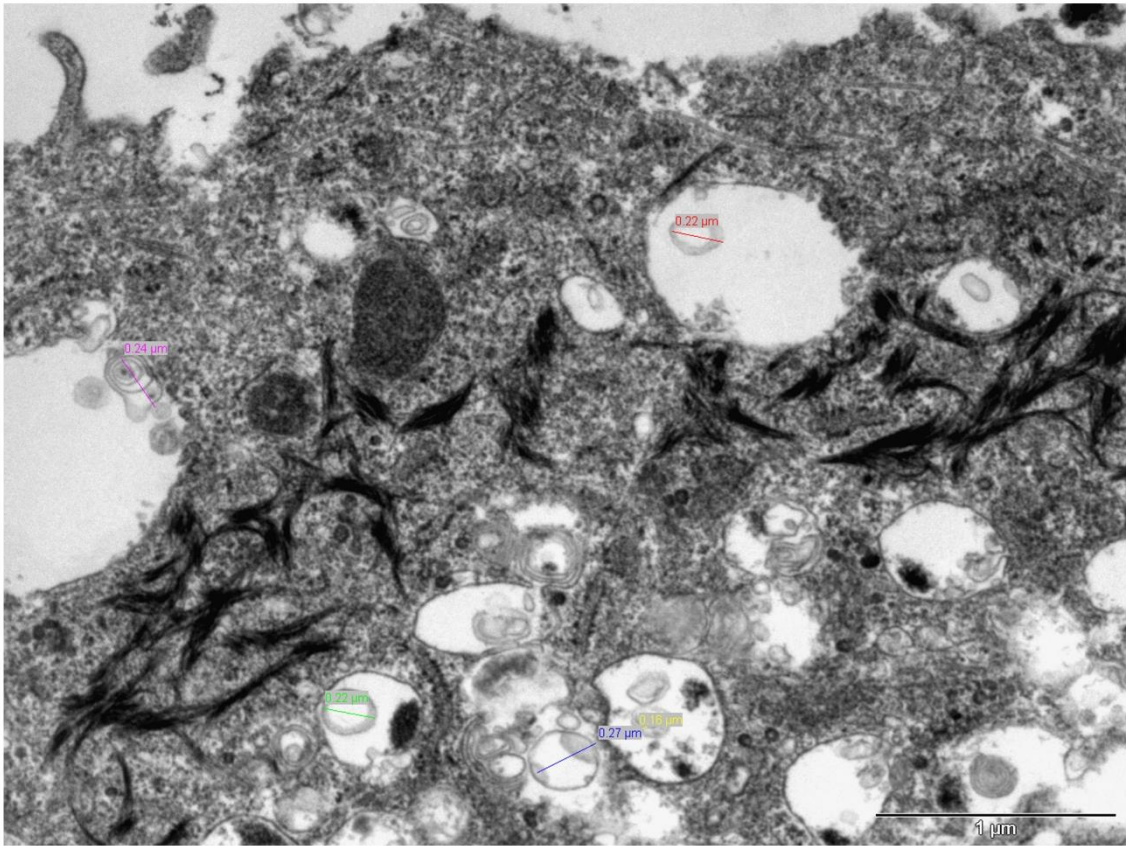

Table S1. Endovesicular PE N/MPL mean diameter calculation.

| Pic 1           | Pic 2    | Pic 3    | Pic 4    | Pic 5    |
|-----------------|----------|----------|----------|----------|
| Distance        | Distance | Distance | Distance | Distance |
| μm              | μm       | μm       | μm       | μm       |
| 0.18            | 0.12     | 0.12     | 0.22     | 0.22     |
| 0.15            | 0.22     | 0.13     | 0.22     | 0.25     |
| 0.26            | 0.19     | 0.15     | 0.16     | 0.15     |
| 0.26            | 0.17     | 0.13     | 0.27     | 0.17     |
| 0.11            | 0.16     | 0.21     | 0.24     | 0.14     |
| 0.14            | 0.17     | 0.15     |          | 0.22     |
| 0.13            | 0.24     | 0.30     |          |          |
| 0.15            |          | 0.17     |          |          |
| 0.17            |          |          |          |          |
|                 |          |          |          |          |
|                 |          |          |          |          |
| Single Pic Mean |          |          |          |          |
| 0.17            | 0.18     | 0.17     | 0.22     | 0.19     |
|                 |          |          |          |          |
| Tot Mean        |          |          |          |          |

|          |      |  |  |  |
|----------|------|--|--|--|
| Distance |      |  |  |  |
| μm       | 0.18 |  |  |  |
| nm       | 180  |  |  |  |

**Figure S2: Uncropped Western Blot images. (a)** WB in Figure 1h. **(b)** WB in Figure 3c.  
The protein standard used in Western Blot analyses was Precision Plus Dual Color BIO-RAD (#1610374)

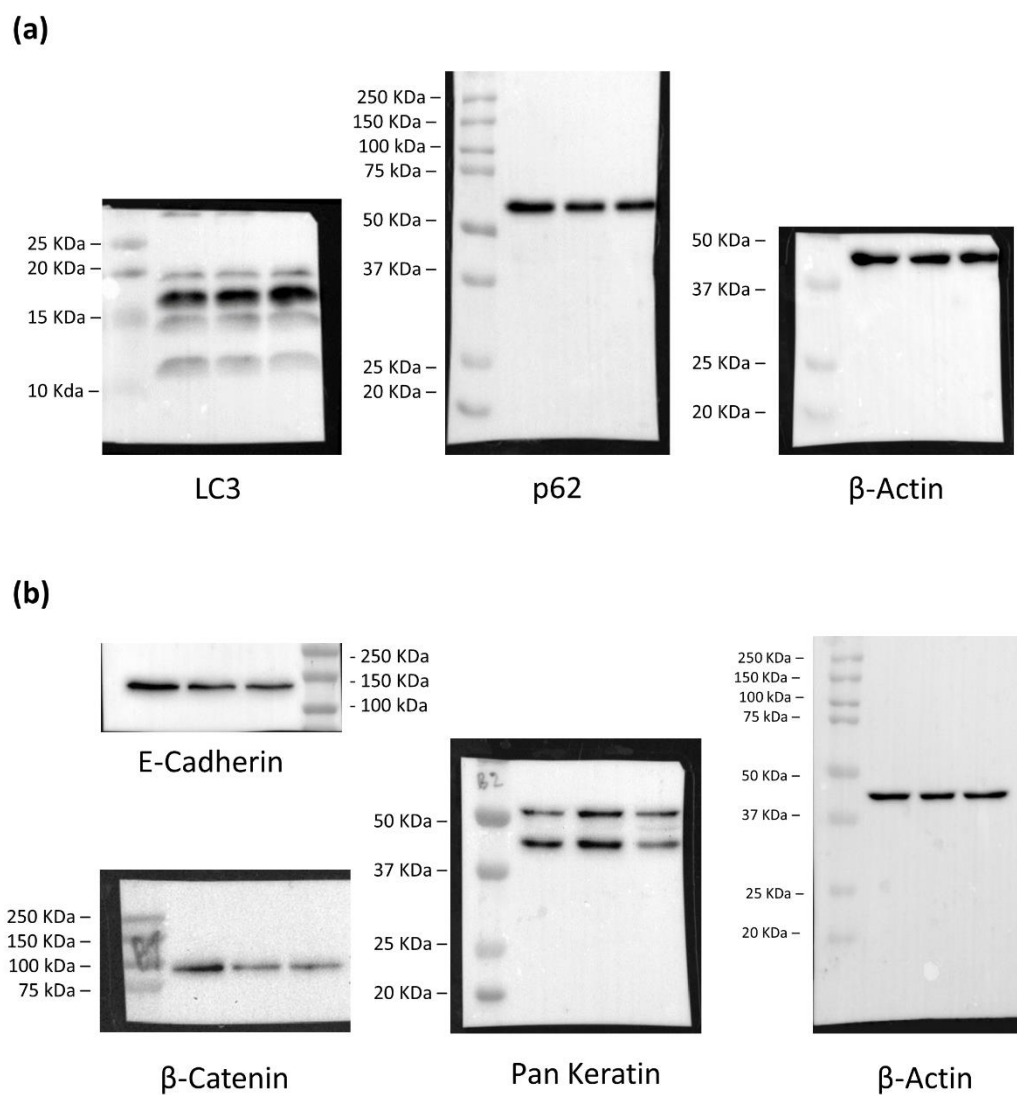

Supplement: s1 [file s1]
